# Supplementary material for: Environmentally responsive composite films fabricated using silk nanofibrils and silver nanowires
Source: Royal Society of Chemistry journal article supplement (doi:10.1039/c8tc04549f), 2018-01-01
Supplement: c8tc04549f1.pdf [file c8tc04549f1.pdf]

## Supporting Information

### Environmentally responsive composite films fabricated using silk nanofibrils and silver nanowires

Jialin Liu,<sup>a</sup> Tengyu He,<sup>b</sup> Guangqiang Fang,<sup>a</sup> Ranran Wang,<sup>b</sup> Elbadawy A. Kamoun,<sup>c</sup> Jinrong Yao,<sup>a</sup> Zhengzhong Shao<sup>a</sup> and Xin Chen<sup>\*a</sup>

<sup>a</sup>State Key Laboratory of Molecular Engineering of Polymers, Department of Macromolecular Science, Laboratory of Advanced Materials, Fudan University, 220 Handan Road, Shanghai, 200433, People's Republic of China. E-mail: chenx@fudan.edu.cn

<sup>b</sup>State Key Laboratory of High Performance Ceramics and Superfine Microstructure, Shanghai Institute of Ceramics, Chinese Academy of Sciences, 585 Heshuo Road, Shanghai 201899, People's Republic of China.

<sup>c</sup>Polymeric Materials Research Department, Advanced Technology and New Materials Research Institute (ATNMRI), City of Scientific Research and Technological Applications (SRTA-City), New Borg Al-Arab City 21934, Alexandria, Egypt.

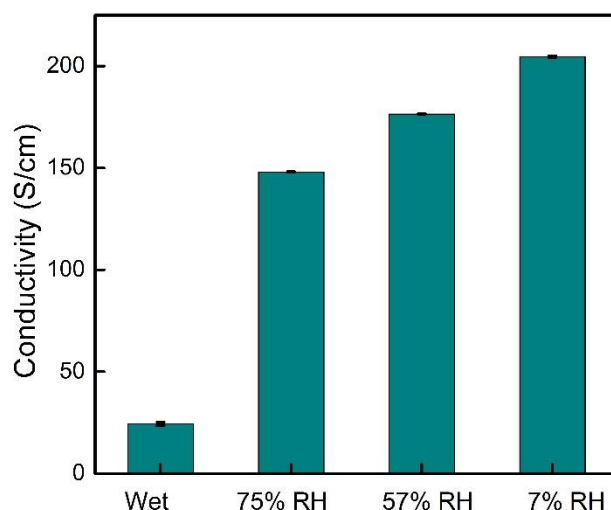

**Fig. S1** Conductivity of AgNWs/SNFs hybrid film at different relative humidity (RH) and in wet state. AgNWs content: 9%. 75% RH is achieved by NaCl saturated aqueous solution, 57% RH is achieved by NaBr saturated aqueous solution, and 7% RH is achieved by LiBr saturated aqueous solution, respectively.

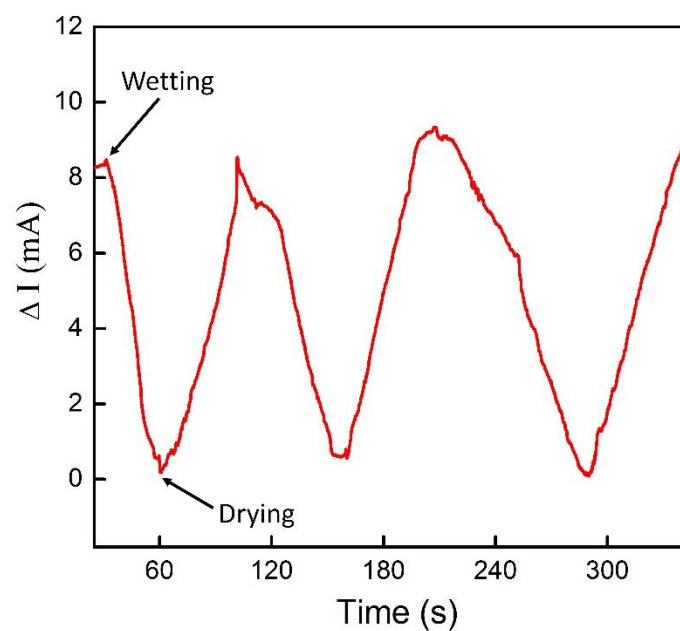

**Fig. S2** Real-time current change of AgNWs/SNFs hybrid film during three wetting and blow-drying cycles. AgNWs content: 7 wt%.

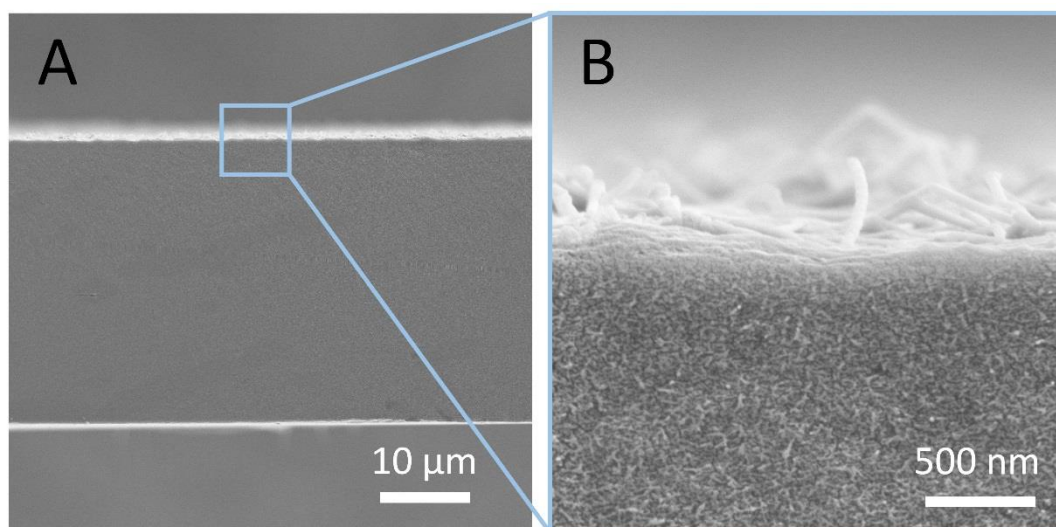

**Fig. S3** (A) SEM image and (B) its enlarged portion of the cross-section of AgNWs/SNFs layered film. AgNWs density:  $200 \text{ mg m}^{-2}$ .
